# Supplementary material for: The effect of 2,4-dichlorophenoxyacetic acid on the production of oat (Avena sativa L.) doubled haploid lines through wide hybridization
Source: PeerJ. 2022 Jan 31;10:e12854. doi: 10.7717/peerj.12854 (PMC8812298; doi:10.7717/peerj.12854)
Supplement: Supplemental Information 1 [file peerj-10-12854-s001.xls]

## Sheet: Calculations 1 
2,4-D:	S - 100 mg, P - 50 mg
genotype	2,4-D	no of florets	Sum	SD	SE	no of ovaries	Sum	SD	SE	no of embryos	Sum	SD	SE	square root of n
1	p	25				23				3							Genotype	no of florets		no of ovaries		no of embryos
1	p	45				42				5								50 mg	100 mg	50 mg	100 mg	50 mg	100 mg
1	p	18				18				10							1	139	418	131	404	31	46
1	p	26				25				10							2	197	371	193	363	15	363
1	p	25	139	10.1341	4.53211	23	131	9.20326	4.11582	3	31	3.56371	1.59374	2.23607			3	302	399	268	410	20	30
2	p	43				43				0							4	124	836	117	788	3	65
2	p	40				40				5							5	99	697	92	619	5	36
2	p	34				32				3							6	311	525	288	502	19	43
2	p	17				16				4							7	164	627	160	610	7	34
2	p	28				28				3							8	94	563	88	544	10	35
2	p	35	197	9.32559	3.80716	34	193	9.60035	3.91933	0	15	2.07364	0.846562	2.44949			9	0	511	0	471	0	34
3	p	62				51				5							10	229	571	224	543	5	12
3	p	35				29				3							11	181	453	158	402	3	18
3	p	30				30				4							12	292	372	259	335	31	22
3	p	24				19				2							13	170	432	157	404	8	27
3	p	41				39				2							14	79	524	70	493	2	40
3	p	30				23				1							15	79	534	43	504	5	36
3	p	22				20				3							16	0	315	0	281	0	14
3	p	58	302	13.4226	4.74561	57	268	14.6242	5.17043	0	20	1.41421	0.5	2.82843			17	0	517	0	503	0	42
4	p	64				60				3							18	0	264	0	228	0	9
4	p	60	124	2.82843	2	57	117	2.12132	1.5	0	3	2.12132	1.5	1.41421			19	92	510	87	481	6	31
5	p	67				65				4							20	101	267	94	247	3	17
5	p	32	99	24.7487	17.5	27	92	26.8701	19	1	5	2.12132	1.5	1.41421			21	60	449	58	421	8	29
6	p	51				43				3							23	253	526	242	510	18	39
6	p	59				55				2							24	240	459	218	420	12	29
6	p	36				34				6							25	82	617	79	589	14	56
6	p	58				51				1							26	182	643	180	621	21	39
6	p	42				42				3							27	284	460	234	438	12	30
6	p	39				37				1							28	293	464	269	448	20	42
6	p	26	311	12.1499	4.59221	26	288	9.92352	3.75074	3	19	1.70434	0.644179	2.64575			29	176	335	165	328	7	19
7	p	47				46				3							30	243	241	215	226	7	17
7	p	65				64				2							31	164	401	161	371	8	11
7	p	52	164	9.29157	5.36449	50	160	9.45163	5.4569	2	7	0.57735	0.333333	1.73205			32	215	385	200	368	17	42
8	p	53				49				9							33	0	420	0	392	0	21
8	p	41	94	8.48528	6	39	88	7.07107	5	1	10	5.65685	4	1.41421			34	0	282	0	256	0	14
10	p	63				62				0							35	0	413	0	370	0	35
10	p	46				45				4							36	6	339	6	311	0	35
10	p	42				40				0							37	0	418	0	370	0	19
10	p	43				42				0							38	13	218	9	195	1	7
10	p	35	229	10.4259	4.66262	35	224	10.2811	4.59783	1	5	1.73205	0.774597	2.23607			39	0	369	0	336	0	35
11	p	45				36				0							40	0	379	0	321	0	32
11	p	30				23				0							41	0	274	0	215	0	14
11	p	33				33				2							42	0	95	0	57	0	1
11	p	36				35				0							43	0	185	0	151	0	3
11	p	37	181	5.63028	2.51794	31	158	5.17687	2.31517	1	3	0.894427	0.4	2.23607			44	0	566	0	461	0	26
12	p	60				55				3							45	36	417	36	366	1	14
12	p	45				40				9							46	0	502	0	442	0	50
12	p	49				38				5
12	p	25				17				1
12	p	31				29				1
12	p	55				53				10
12	p	27	292	14.056	5.31267	27	259	13.8684	5.24177	2	31	3.73529	1.41181	2.64575
13	p	65				64				3
13	p	40				35				0
13	p	29				26				3
13	p	36	170	15.6738	7.83688	32	157	16.9189	8.45946	2	8	1.41421	0.707107	2
14	p	42				37				1
14	p	37	79	3.53553	2.5	33	70	2.82843	2	1	2	0	0	1.41421
15	p	79				43				5
15	p	79	79	0	0	43	43	0	0	5	5	0	0	1.41421
19	p	50				50				5
19	p	42	92	5.65685	4	37	87	9.19239	6.5	1	6	2.82843	2	1.41421
20	p	32				28				1
20	p	29				29				0
20	p	23				21				1
20	p	17	101	6.65207	3.32603	16	94	6.13732	3.06866	1	3	0.5	0.25	2
21	p	60				58				8
21	p	60	60	0	0	58	58	0	0	8	8	0	0	1.41421
23	p	56				47				0
23	p	36				35				4
23	p	43				41				6
23	p	40				36				4
23	p	48				56				2
23	p	30	253	9.13053	3.72753	27	242	10.1522	4.14461	2	18	2.09762	0.856349	2.44949
24	p	42				36				0
24	p	58				50				2
24	p	42				40				4
24	p	32				31				3
24	p	37				32				2
24	p	29	240	10.2567	4.18728	29	218	7.76316	3.1693	1	12	1.41421	0.57735	2.44949
25	p	49				49				2
25	p	33	82	11.3137	8	30	79	13.435	9.5	12	14	7.07107	5	1.41421
26	p	59				58				10
26	p	55				55				3
26	p	37				36				4
26	p	31	182	13.6015	6.80074	31	180	13.4907	6.74537	4	21	3.20156	1.60078	2
27	p	44				36				0
27	p	25				18				0
27	p	35				27				0
27	p	47				43				2
27	p	30				30				3
27	p	40				27				0
27	p	29				19				3
27	p	34	284	7.6532	2.70581	34	234	8.44732	2.98658	4	12	1.69031	0.597614	2.82843
28	p	43				43				3
28	p	58				57				3
28	p	34				34				1
28	p	30				30				8
28	p	31				20				1
28	p	34				24				0
28	p	37				36				2
28	p	26	293	9.99911	3.53522	25	269	11.9873	4.23817	2	20	2.44949	0.866025	2.82843
29	p	37				32				3
29	p	17				17				0
29	p	19				18				0
29	p	25				25				1
29	p	20				20				1
29	p	21				21				1
29	p	14				14				1
29	p	23	176	6.94879	2.45677	18	165	5.60453	1.9815	0	7	0.991031	0.350382	2.82843
30	p	43				42				3
30	p	37				33				1
30	p	24				21				1
30	p	20				20				0
30	p	10				8				0
30	p	18				15				0
30	p	20				18				0
30	p	14				14				1
30	p	22				21				0
30	p	35	243	10.6359	3.36336	23	215	9.72111	3.07409	1	7	0.948683	0.3	3.16228
31	p	30				30				2
31	p	43				43				2
31	p	25				23				1
31	p	41				40				1
31	p	25	164	8.67179	3.87814	25	161	8.92749	3.99249	2	8	0.547723	0.244949	2.23607
32	p	44				44				3
32	p	36				34				3
32	p	28				28				4
32	p	35				33				4
32	p	31				25				2
32	p	22				20				0
32	p	19	215	8.59679	3.24928	16	200	9.41377	3.55807	1	17	1.51186	0.571429	2.64575
36	p	6				6				0
36	p	6	6	0	0	6	6	0	0	0	0	0	0	1.41421
38	p	13				9				1
38	p	13	13	0	0	9	9	0	0	1	1	0	0	1.41421
45	p	36				36				1
45	p	36	36	0	0	36	36	0	0	1	1	0	0	1.41421
1	s	40				39				5
1	s	43				43				1
1	s	29				29				5
1	s	27				24				2
1	s	9				6				2
1	s	30				29				4
1	s	20				19				0
1	s	18				18				1
1	s	13				13				0
1	s	30				30				4
1	s	38				37				2
1	s	29				29				2
1	s	27				26				3
1	s	24				24				8
1	s	28				27				3
1	s	13	418	9.71511	2.42878	11	404	10.0962	2.52405	4	46	2.09364	0.52341	4
2	s	45				41				10
2	s	36				35				5
2	s	26				25				2
2	s	31				29				3
2	s	18				16				2
2	s	32				31				4
2	s	17				17				0
2	s	25				24				0
2	s	31				29				0
2	s	9				9				0
2	s	16				25				1
2	s	26				24				4
2	s	28				28				2
2	s	16				16				2
2	s	15	371	9.57278	2.47168	14	363	8.57071	2.21295	0	35	2.69037	0.694651	3.87298
3	s	31				29				7
3	s	44				44				4
3	s	55				53				0
3	s	32				32				0
3	s	25				24				2
3	s	43				41				4
3	s	29				28				4
3	s	43				71				2
3	s	18				15				2
3	s	35				33				0
3	s	25				22				1
3	s	19	399	11.1935	3.2313	18	410	15.9706	4.61032	4	30	2.15322	0.621582	3.4641
4	s	65				60				1
4	s	83				76				12
4	s	81				79				4
4	s	46				46				5
4	s	30				23				5
4	s	40				39				1
4	s	49				45				1
4	s	31				27				3
4	s	49				40				1
4	s	37				37				2
4	s	32				30				2
4	s	53				52				2
4	s	25				25				2
4	s	30				30				2
4	s	36				34				4
4	s	44				44				5
4	s	32				29				4
4	s	24				24				2
4	s	49	836	17.0457	3.91055	48	788	16.2733	3.73334	7	65	2.69394	0.618032	4.3589
5	s	64				61				1
5	s	69				48				0
5	s	36				33				2
5	s	45				39				2
5	s	35				33				1
5	s	52				52				5
5	s	12				12				0
5	s	44				25				3
5	s	21				18				3
5	s	45				45				0
5	s	43				43				0
5	s	47				36				4
5	s	33				30				4
5	s	26				24				2
5	s	28				28				0
5	s	23				21				2
5	s	25				23				2
5	s	22				21				2
5	s	27	697	15.015	3.44468	27	619	12.7467	2.9243	3	36	1.52369	0.349559	4.3589
6	s	59				59				5
6	s	48				41				1
6	s	37				36				1
6	s	46				46				10
6	s	52				52				6
6	s	25				22				1
6	s	27				24				1
6	s	46				46				6
6	s	30				30				4
6	s	28				22				0
6	s	49				48				8
6	s	47				45				0
6	s	31	525	11.1694	3.09785	31	502	12.0522	3.34269	0	43	3.4006	0.943158	3.60555
7	s	42				40				4
7	s	64				64				4
7	s	54				49				7
7	s	50				48				6
7	s	34				34				0
7	s	45				44				0
7	s	23				22				0
7	s	21				21				2
7	s	23				23				0
7	s	35				34				1
7	s	23				23				1
7	s	23				23				1
7	s	29				27				0
7	s	32				32				1
7	s	43				43				4
7	s	31				31				0
7	s	31				31				3
7	s	24	627	12.3919	2.9208	21	610	12.0142	2.83176	0	34	2.24628	0.529452	4.24264
8	s	49				47				10
8	s	31				50				3
8	s	57				53				0
8	s	44				36				1
8	s	25				23				1
8	s	42				41				3
8	s	26				25				1
8	s	34				34				2
8	s	41				34				3
8	s	38				36				0
8	s	42				41				5
8	s	30				26				0
8	s	14				14				0
8	s	30				26				3
8	s	33				31				2
8	s	27	563	10.5212	2.6303	27	544	10.583	2.64575	1	35	2.53558	0.633895	4
9	s	46				44				2
9	s	32				29				0
9	s	33				33				2
9	s	37				34				1
9	s	44				41				3
9	s	29				29				3
9	s	37				35				3
9	s	27				27				1
9	s	38				38				0
9	s	5				4				1
9	s	7				7				0
9	s	12				12				2
9	s	29				28				3
9	s	25				20				0
9	s	30				30				6
9	s	13				12				1
9	s	7				6				1
9	s	9				0				0
9	s	11				11				1
9	s	32				30				4
9	s	8	511	13.3691	2.91738	1	471	13.9161	3.03674	0	34	1.59613	0.348303	4.58258
10	s	63				62				0
10	s	64				63				0
10	s	55				49				6
10	s	53				51				1
10	s	48				48				0
10	s	45				43				1
10	s	43				41				1
10	s	20				16				0
10	s	42				42				1
10	s	27				27				0
10	s	14				13				0
10	s	8				8				0
10	s	31				25				2
10	s	34				31				0
10	s	24	571	17.2935	4.46517	24	543	17.1889	4.43815	0	12	1.56753	0.404734	3.87298
11	s	57				52				1
11	s	28				27				2
11	s	16				12				1
11	s	35				35				2
11	s	29				29				4
11	s	20				20				0
11	s	21				21				1
11	s	18				18				0
11	s	29				29				3
11	s	31				4				0
11	s	26				25				0
11	s	36				34				0
11	s	28				27				0
11	s	21				21				1
11	s	13				10				0
11	s	26				19				1
11	s	19	453	10.167	2.46586	19	402	10.9883	2.66505	2	18	1.19742	0.290418	4.12311
12	s	44				38				1
12	s	61				58				7
12	s	47				38				4
12	s	30				29				4
12	s	39				37				1
12	s	56				52				0
12	s	21				17				1
12	s	33				27				3
12	s	20				20				0
12	s	21	372	14.7407	4.66143	19	335	13.8343	4.3748	1	22	2.25093	0.711805	3.16228
13	s	51				49				4
13	s	41				31				0
13	s	29				28				1
13	s	53				52				3
13	s	29				27				3
13	s	38				36				1
13	s	29				29				2
13	s	26				23				0
13	s	24				18				2
13	s	30				30				6
13	s	43				43				4
13	s	15				14				1
13	s	24	432	11.1964	3.10532	24	404	11.3097	3.13676	0	27	1.84669	0.512179	3.60555
14	s	53				50				1
14	s	41				37				1
14	s	39				39				2
14	s	38				38				0
14	s	36				34				0
14	s	23				23				0
14	s	27				21				0
14	s	17				17				3
14	s	22				22				1
14	s	24				24				0
14	s	21				15				0
14	s	24				22				1
14	s	32				30				0
14	s	11				11				0
14	s	7				5				0
14	s	19				17				0
14	s	17				15				0
14	s	18				18				0
14	s	15				15				16
14	s	19				19				15
14	s	21	524	11.169	2.43729	21	493	10.8518	2.36806	0	40	4.59244	1.00215	4.58258
15	s	74				71				9
15	s	32				32				3
15	s	34				33				0
15	s	32				26				3
15	s	32				31				3
15	s	50				46				1
15	s	34				32				2
15	s	20				20				0
15	s	17				16				2
15	s	35				33				3
15	s	25				24				1
15	s	28				26				2
15	s	40				40				7
15	s	20				18				0
15	s	16				16				0
15	s	13				11				0
15	s	32	534	14.4873	3.51369	29	504	13.9819	3.3911	0	36	2.54662	0.617647	4.12311
16	s	35				32				3
16	s	22				18				0
16	s	25				20				1
16	s	8				7				2
16	s	20				20				2
16	s	11				11				0
16	s	29				27				5
16	s	32				30				1
16	s	33				25				0
16	s	25				20				0
16	s	29				29				0
16	s	24				23				0
16	s	22	315	7.99118	2.21635	19	281	7.24038	2.00812	0	14	1.5525	0.430586	3.60555
17	s	65				60				6
17	s	52				52				6
17	s	27				26				0
17	s	21				21				1
17	s	25				25				0
17	s	37				37				3
17	s	39				38				4
17	s	32				31				4
17	s	23				23				3
17	s	24				22				5
17	s	6				6				1
17	s	27				25				2
17	s	21				20				3
17	s	23				23				1
17	s	40				40				2
17	s	22				21				0
17	s	16				16				0
17	s	17	517	13.8428	3.26279	17	503	13.1796	3.10647	1	42	2.0292	0.478287	4.24264
18	s	26				23				0
18	s	15				7				0
18	s	17				15				0
18	s	17				13				0
18	s	20				16				0
18	s	28				28				4
18	s	23				20				3
18	s	11				11				0
18	s	16				14				1
18	s	12				12				1
18	s	27				24				0
18	s	16				12				0
18	s	26				24				0
18	s	10	264	6.1751	1.65037	9	228	6.42625	1.71749	0	9	1.27745	0.341412	3.74166
19	s	43				43				2
19	s	59				53				3
19	s	25				24				3
19	s	33				28				2
19	s	38				38				5
19	s	31				30				0
19	s	29				23				1
19	s	36				36				2
19	s	25				25				1
19	s	25				25				1
19	s	26				23				1
19	s	34				32				4
19	s	35				33				3
19	s	8				7				0
19	s	8				8				0
19	s	17				16				2
19	s	13				13				0
19	s	25	510	12.4947	2.94503	24	481	11.7313	2.7651	1	31	1.44733	0.34114	4.24264
20	s	24				24				1
20	s	29				27				1
20	s	32				32				2
20	s	39				36				2
20	s	26				25				2
20	s	47				47				5
20	s	9				5				0
20	s	13				11				0
20	s	9				6				0
20	s	16				12				2
20	s	23	267	12.1745	3.67075	22	247	13.1253	3.95742	2	17	1.4397	0.434085	3.31662
21	s	34				34				4
21	s	16				11				1
21	s	25				19				2
21	s	38				37				2
21	s	25				24				3
21	s	21				19				2
21	s	25				25				1
21	s	27				27				4
21	s	30				25				2
21	s	21				18				1
21	s	29				28				2
21	s	30				30				1
21	s	29				27				3
21	s	33				32				1
21	s	11				11				0
21	s	20				20				0
21	s	35	449	7.07159	1.71511	34	421	7.64468	1.85411	0	29	1.26317	0.306363	4.12311
23	s	55				48				6
23	s	53				46				2
23	s	51				47				10
23	s	19				30				0
23	s	55				54				9
23	s	44				42				3
23	s	36				36				2
23	s	34				33				1
23	s	36				36				2
23	s	28				26				2
23	s	26				26				1
23	s	29				28				0
23	s	17				17				1
23	s	43	526	12.9538	3.46206	41	510	10.4419	2.79071	0	39	3.23867	0.865572	3.74166
24	s	70				62				0
24	s	23				21				1
24	s	42				41				6
24	s	50				47				5
24	s	38				36				1
24	s	38				36				4
24	s	22				22				6
24	s	27				24				3
24	s	24				15				1
24	s	10				10				0
24	s	25				24				0
24	s	37				37				1
24	s	21				20				0
24	s	12				10				0
24	s	20	459	15.5921	4.02587	15	420	14.789	3.8185	1	29	2.25093	0.581187	3.87298
25	s	57				56				14
25	s	51				48				4
25	s	50				47				5
25	s	42				40				3
25	s	29				29				0
25	s	31				30				4
25	s	27				25				1
25	s	37				35				3
25	s	45				45				0
25	s	24				24				2
25	s	48				40				6
25	s	19				17				1
25	s	34				34				2
25	s	26				26				2
25	s	32				32				4
25	s	23				21				1
25	s	11				11				2
25	s	20				18				1
25	s	11	617	13.4799	3.0925	11	589	12.7671	2.92898	1	56	3.15302	0.723352	4.3589
26	s	57				49				6
26	s	61				61				4
26	s	34				31				1
26	s	51				50				1
26	s	43				43				7
26	s	30				29				1
26	s	47				46				3
26	s	23				23				0
26	s	30				29				2
26	s	39				39				0
26	s	41				41				2
26	s	37				36				0
26	s	19				16				2
26	s	33				33				3
26	s	38				36				2
26	s	16				16				0
26	s	23				22				3
26	s	21	643	12.9151	3.04413	21	621	12.4959	2.94531	2	39	1.97782	0.466176	4.24264
27	s	45				42				0
27	s	48				47				7
27	s	43				41				4
27	s	36				31				1
27	s	33				33				2
27	s	28				28				2
27	s	30				24				0
27	s	24				23				3
27	s	23				21				0
27	s	34				34				5
27	s	26				26				3
27	s	34				32				2
27	s	26				26				0
27	s	30	460	7.85305	2.09881	30	438	7.66037	2.04732	1	30	2.10703	0.563127	3.74166
28	s	39				38				9
28	s	46				39				5
28	s	50				50				2
28	s	39				39				6
28	s	28				22				1
28	s	40				29				2
28	s	37				37				1
28	s	35				33				4
28	s	19				32				0
28	s	30				30				7
28	s	30				30				2
28	s	38				37				0
28	s	18				17				2
28	s	15	464	10.4208	2.78508	15	448	9.36442	2.50275	1	42	2.7735	0.741249	3.74166
29	s	36				39				1
29	s	23				23				1
29	s	27				27				0
29	s	44				44				1
29	s	26				25				4
29	s	28				25				2
29	s	25				23				2
29	s	23				23				2
29	s	25				24				2
29	s	29				29				3
29	s	32				32				1
29	s	17	335	6.94731	2.00552	14	328	7.94679	2.29404	0	19	1.1645	0.336162	3.4641
30	s	32				32				6
30	s	21				19				5
30	s	31				30				1
30	s	22				20				0
30	s	23				23				1
30	s	5				4				0
30	s	32				32				3
30	s	13				8				0
30	s	20				20				1
30	s	24				21				0
30	s	18	241	8.22745	2.48067	17	226	8.97066	2.70476	0	17	2.16165	0.651762	3.31662
31	s	36				34				1
31	s	29				29				1
31	s	20				20				0
31	s	18				18				0
31	s	28				27				0
31	s	34				28				4
31	s	34				34				1
31	s	27				27				1
31	s	20				20				0
31	s	22				22				1
31	s	15				14				1
31	s	24				23				0
31	s	21				20				0
31	s	20				18				1
31	s	14				13				0
31	s	15				11				0
31	s	24	401	6.84707	1.66066	13	371	7.13473	1.73043	0	11	0.996317	0.241642	4.12311
32	s	40				39				5
32	s	39				36				13
32	s	16				13				1
32	s	41				41				3
32	s	23				23				1
32	s	13				13				3
32	s	32				32				3
32	s	34				31				2
32	s	41				41				2
32	s	16				15				3
32	s	21				18				1
32	s	24				24				1
32	s	14				14				2
32	s	31	385	10.5957	2.83182	28	368	10.6079	2.83508	2	42	3.08844	0.82542	3.74166
33	s	20				16				0
33	s	34				26				1
33	s	24				23				0
33	s	18				18				2
33	s	6				5				0
33	s	10				9				1
33	s	32				31				3
33	s	9				7				1
33	s	17				17				0
33	s	23				21				1
33	s	24				24				6
33	s	22				19				0
33	s	19				19				0
33	s	16				16				2
33	s	26				24				0
33	s	21				21				0
33	s	33				31				0
33	s	29				29				1
33	s	24				23				3
33	s	13	420	7.82708	1.75019	13	392	7.32264	1.63739	0	21	1.53811	0.343932	4.47214
34	s	23				23				1
34	s	23				23				1
34	s	16				16				0
34	s	10				8				1
34	s	13				12				1
34	s	15				9				0
34	s	19				18				1
34	s	9				7				0
34	s	12				6				0
34	s	13				12				1
34	s	11				10				1
34	s	18				18				1
34	s	12				12				1
34	s	4				2				1
34	s	9				9				0
34	s	16				16				4
34	s	11				10				0
34	s	10				10				0
34	s	12				10				0
34	s	11				11				0
34	s	15	282	4.63219	1.01083	14	256	5.29735	1.15598	0	14	0.912871	0.199205	4.58258
35	s	20				19				1
35	s	18				17				1
35	s	22				22				2
35	s	25				24				0
35	s	33				26				3
35	s	10				10				2
35	s	25				18				2
35	s	25				24				10
35	s	39				38				5
35	s	16				14				1
35	s	22				16				1
35	s	10				9				1
35	s	19				17				0
35	s	18				18				2
35	s	36				33				2
35	s	22				21				2
35	s	27				19				0
35	s	26	413	7.77229	1.83195	25	370	7.22107	1.70202	0	35	2.36325	0.557024	4.24264
36	s	13				13				0
36	s	30				29				5
36	s	26				26				1
36	s	19				19				0
36	s	11				7				4
36	s	34				29				8
36	s	38				35				10
36	s	31				28				3
36	s	11				9				0
36	s	24				22				2
36	s	24				20				0
36	s	44				40				0
36	s	18				18				2
36	s	16	339	10.2595	2.74198	16	311	9.5368	2.54882	0	35	3.22848	0.862847	3.74166
37	s	25				24				2
37	s	19				17				0
37	s	29				25				2
37	s	25				25				0
37	s	33				31				5
37	s	22				19				1
37	s	31				30				1
37	s	9				9				1
37	s	17				16				1
37	s	22				21				3
37	s	17				16				1
37	s	13				10				1
37	s	12				12				0
37	s	16				16				1
37	s	35				23				0
37	s	23				10				0
37	s	18				15				0
37	s	31				31				0
37	s	21	418	7.38617	1.6945	20	370	6.99499	1.60476	0	19	1.29099	0.296174	4.3589
38	s	24				19				1
38	s	14				13				0
38	s	11				9				0
38	s	19				15				0
38	s	15				13				0
38	s	15				15				1
38	s	11				10				0
38	s	11				11				2
38	s	14				12				0
38	s	17				14				0
38	s	17				16				1
38	s	19				18				0
38	s	14				14				1
38	s	5				5				0
38	s	4				4				0
38	s	8	218	5.23927	1.30982	7	195	4.32387	1.08097	1	7	0.629153	0.157288	4
39	s	23				21				3
39	s	15				13				0
39	s	34				32				3
39	s	33				24				1
39	s	17				17				1
39	s	13				13				1
39	s	19				14				1
39	s	16				14				0
39	s	24				23				5
39	s	21				21				1
39	s	22				22				5
39	s	11				11				3
39	s	31				29				0
39	s	37				36				5
39	s	31				26				5
39	s	22	369	8.00391	2.00098	20	336	7.26636	1.81659	1	35	1.93972	0.484929	4
40	s	18				13				1
40	s	19				15				1
40	s	32				18				1
40	s	32				28				0
40	s	32				28				4
40	s	21				20				2
40	s	27				26				5
40	s	33				29				6
40	s	11				10				1
40	s	24				23				2
40	s	23				23				5
40	s	16				10				2
40	s	24				20				0
40	s	22				19				0
40	s	22				21				1
40	s	23	379	6.28987	1.57247	18	321	6.03842	1.5096	1	32	1.93218	0.483046	4
41	s	35				28				1
41	s	13				8				1
41	s	17				11				2
41	s	22				15				3
41	s	12				11				3
41	s	19				13				3
41	s	26				17				1
41	s	45				37				0
41	s	18				18				0
41	s	27				27				0
41	s	7				4				0
41	s	16				12				0
41	s	17	274	10.1855	2.82494	14	215	9.10691	2.5258	0	14	1.25576	0.348284	3.60555
42	s	22				19				0
42	s	13				8				0
42	s	7				3				1
42	s	20				11				0
42	s	19				10				0
42	s	14	95	5.56477	2.27181	6	57	5.46809	2.23234	0	1	0.408248	0.166667	2.44949
43	s	12				12				1
43	s	45				38				2
43	s	22				15				0
43	s	22				18				0
43	s	37				32				0
43	s	37				26				0
43	s	10	185	13.4519	5.08432	10	151	10.6436	4.02289	0	3	0.786796	0.297381	2.64575
44	s	39				22				0
44	s	40				34				1
44	s	19				14				0
44	s	43				30				0
44	s	17				16				1
44	s	49				45				5
44	s	32				27				6
44	s	30				27				0
44	s	28				19				1
44	s	40				36				2
44	s	46				36				1
44	s	15				15				0
44	s	35				23				0
44	s	35				34				7
44	s	31				30				1
44	s	29				18				1
44	s	38	566	9.7517	2.36513	35	461	8.96439	2.17418	0	26	2.23935	0.543123	4.12311
45	s	46				40				2
45	s	38				37				2
45	s	15				13				1
45	s	25				23				0
45	s	26				26				0
45	s	23				20				0
45	s	18				18				0
45	s	22				20				0
45	s	13				13				0
45	s	4				4				0
45	s	19				19				1
45	s	28				28				1
45	s	25				20				3
45	s	20				17				0
45	s	11				9				0
45	s	23				21				0
45	s	30				19				2
	s	31	417	9.78745	2.30692	19	366	8.70429	2.05162	2	14	1.00326	0.236471	4.24264
46	s	46				40				5
46	s	22				9				1
46	s	30				30				3
46	s	31				30				6
46	s	26				24				0
46	s	56				53				10
46	s	41				40				11
46	s	30				28				2
46	s	23				21				6
46	s	33				31				2
46	s	15				14				0
46	s	46				42				0
46	s	11				4				0
46	s	48				43				3
46	s	34				29				1
46	s	10	502	13.5247	3.38117	4	442	14.4309	3.60772	0	50	3.55668	0.889171	4

## Sheet: Calculations 2
																																			Plants after colchicine treatment
Genotype	Pollinated florets		Isolated ovaries		Haploid embryos		Haploid embryos/florets [% ± SE]						Haploid plants		DH plants		Number of seeds				Genotype	Haploid plants									Haploids												In soil			After colchicine
	50 mg	100 mg	50 mg	100 mg	50 mg	100 mg	50 mg			100 mg			50 mg	100 mg	50 mg	100 mg	50 mg	100 mg				50 mg	100 mg	Sum	50 mg	100 mg		Genotype			50 mg	100 mg			Genotype	50 mg	100 mg			Genotype	Genotype		50 mg	100 mg	Suma	50 mg	100 mg	suma	50 mg
1	139	139.333	131	134.667	31	15.3333	25.8256	±	3.06186	11.0048	±	0.83135	2	4	2	4	0	120			1.	2	4	6	33.3333	66.6667		1.	1.	DC 11003	33.3333	66.6667			1.	20	80			1.	1.	DC 11003	4	4	8	1	4	5	25
2	197	123.667	193	121	15	11.6667	13.9	±	3.3	9.43396	±	0.5	3	2	3	1	100	18			2.	3	2	5	60	40		2.	2.	DC 11021	60	40			2.	33.3333	66.6667			2.	2.	DC 11021	4	2	6	1	2	3	25
3	302	133	268	136.667	20	10	8.59291	±	1.46156	7.5188	±	0.730172	1	1	1	1	36	40			3.	1	1	2	50	50		3.	3.	DC 11027	50	50			3.	50	50			3.	3.	DC 11027	2	2	4	1	1	2	50
4	124	278.667	117	262.667	3	21.6667	4.6875	±	0	7.77512	±	0.345087	0	2	0	2	0	5			4.	0	2	2	0	100		4.	4.	DC 11033	0	100			4.	0	100			4.	4.	DC 11033	0	3	3	0	1	1	0
5	99	232.333	92	206.333	5	12	4.54757	±	1.42257	5.16499	±	0.311094	0	1	0	1	0	6			5.	0	1	1	0	100		5.	5.	DC 11040	0	100			5.	0	100			5.	5.	DC 11040	0	2	2	0	1	1	0
6	311	175	288	167.333	19	14.3333	7	±	2	8.19048	±	0.7	1	1	1	1	6	35			6.	1	1	2	50	50		6.	6.	DC 11125	50	50			6.	50	50			6.	6.	DC 11125	2	2	4	1	1	2	50
7	164	209	160	203.333	7	11.3333	4.4	±	1	5.42265	±	0.366667	1	4	1	4	0	24			7.	1	4	5	20	80		7.	7.	DC 11142	20	80			7.	25	75			7.	7.	DC 11142	1	3	4	1	3	4	100
8	94	187.667	88	181.333	10	11.6667	9.71008	±	7.27105	6.2167	±	0.475663	0	3	0	2	0	91			8.	0	3	3	0	100		8.	8.	DC 11146	0	100			8.	0	100			8.	8.	DC 11146	0	6	6	0	3	3	0
10	229	190.333	224	181	5	4	5.7764	±	2.91925	2.10158	±	0.494442	0	0	0	0	0	0			10.	0	0	0	0	0		10.	9.	DC 11164	0	0			10.	0	0			10.	9.	DC 11164	1	0	1	0	0	0	0
11	181	151	158	134	3	6	4.38165	±	1.67895	3.97351	±	0.38388	0	3	0	3	0	68			11.	0	3	3	0	100		11.	10.	DC 11209	0	100			11.	0	100			11.	10.	DC 11209	0	3	3	0	2	2	0
12	292	124	259	111.667	31	7.33333	9.71702	±	1.83076	5.91398	±	0.485427	5	4	3	4	87	85			12.	5	4	9	55.5556	44.4444		12.	11.	DC 11221	55.5556	44.4444			12.	55.5556	44.4444			12.	11.	DC 11221	7	4	11	5	4	9	71.4286
13	170	144	157	134.667	8	9	6.8	±	1.8	6.25	±	0.5	0	1	0	1	0	91			13.	0	1	1	0	100		13.	12.	DC 11244	0	100			13.	0	100			13.	12.	DC 11244	0	2	2	0	1	1	0
14	79	174.667	70	164.333	2	13.3333	2.54183	±	0.160875	7.63359	±	3.53984	0	0	0	0	0	0			14.	0	0	0	0	0		14.	13.	POB 14/2013	0	0			14.	0	0			14.	13.	POB 14/2013	0	0	0	0	0	0	0
15	79	178	43	168	5	12	6.32911	±	0	6.74157	±	0.423258	0	0	0	0	0	0			15.	0	0	0	0	0		15.	14.	POB 15/2013	0	0			15.	0	0			15.	14.	POB 15/2013	1	0	1	0	0	0	0
19	92	170	87	160.333	6	10.3333	6.2	±	2.8	6.07843	±	0.333333	0	1	0	1	0	0			19.	0	1	1	0	100		19.	15.	POB 19/2013	0	100			19.	0	100			19.	15.	POB 19/2013	0	1	1	0	1	1	0
20	101	89	94	82.3333	3	5.66667	4.5	±	0.8	6.36704	±	0.366667	0	0	0	0	0	0			20.	0	0	0	0	0		20.	16.	POB 20/2013	0	0			20.	0	0			20.	16.	POB 20/2013	0	0	0	0	0	0	0
21	60	149.667	58	140.333	8	9.66667	13.3333	±	0	6.4588	±	0.321113	0	3	0	1	0	207			21.	0	3	3	0	100		21.	17.	POB 21/2013	0	100			21.	0	100			21.	17.	POB 21/2013	1	3	4	0	3	3	0
23	253	175.333	242	170	18	13	9.2	±	1.7	7.41445	±	0.8	3	2	3	1	114	0			38.	0	0	0	0	0		38.	18.	POB 38/2013	0	0			38.	0	0			38.	18.	POB 38/2013	0	0	0	0	0	0	0
24	240	153	218	140	12	9.66667	6.2	±	1.4	6.31808	±	0.533333	4	3	3	3	278	54			23.	3	2	5	60	40		23.	19.	STH 2.3602	60	40			23.	33.3333	66.6667			23.	19.	STH 2.3602	1	3	4	1	2	3	100
25	82	205.667	79	196.333	14	18.6667	20.2226	±	2.141	9.07618	±	0.432718	0	4	0	4	0	774			24.	4	3	7	57.1429	42.8571		24.	20.	STH 2.3618	57.1429	42.8571			24.	66.6667	33.3333			24.	20.	STH 2.3618	3	3	6	2	1	3	66.6667
26	182	214.333	180	207	21	13	11.5294	±	2.39237	6.06532	±	0.36314	2	1	2	1	82	0			25.	0	4	4	0	100		25.	21.	STH 2.3619	0	100			25.	0	100			25.	21.	STH 2.3619	0	4	4	0	4	4	0
27	284	153.333	234	146	12	10	9.09121	±	1.65657	6.52174	±	0.464385	3	2	2	2	69	291			26.	2	1	3	66.6667	33.3333		26.	22.	STH 2.3621	66.6667	33.3333			26.	50	50			26.	22.	STH 2.3621	2	1	3	1	1	2	50
28	293	154.667	269	149.333	20	14	8.3	±	2.1	9.05172	±	0.7	0	1	0	1	0	0			27.	3	2	5	60	40		27.	23.	STH 2.3626	60	40			27.	60	40			27.	23.	STH 2.3626	3	3	6	3	2	5	100
29	176	111.667	165	109.333	7	6.33333	5.8	±	0.8	5.67164	±	0.433333	1	3	0	3	0	121			28.	0	1	1	0	100		28.	24.	STH 2.3628	0	100			28.	0	0			28.	24.	STH 2.3628	1	1	2	0	0	0	0
30	243	80.3333	215	75.3333	7	5.66667	4.76922	±	0.969457	7.05394	±	1.16604	0	1	0	1	0	169			29.	1	3	4	25	75		29.	25.	STH 2.3644	25	75			29.	25	75			29.	25.	STH 2.3644	1	4	5	1	3	4	100
31	164	133.667	161	123.667	8	3.66667	5.15137	±	0.98345	2.74314	±	0.350513	0	0	0	0	0	0			30.	0	1	1	0	100		30.	26.	STH 2.3646	0	100			30.	0	100			30.	26.	STH 2.3646	0	1	1	0	1	1	0
32	215	128.333	200	122.667	17	14	8.8	±	1.4	10.9091	±	0.766667	1	2	1	2	0	8			31.	0	0	0	0	0		31.	27.	STH 2.3659	0	0			31.	0	0			31.	27.	STH 2.3659	0	0	0	0	0	0	0
38	13	72.6667	9	65	1	2.33333	7.69231	±	0	3.21101	±	0.716166	0	0	0	0	0	0			32.	1	2	3	33.3333	66.6667		32.	28.	STH 2.3668	33.3333	66.6667			32.	33.3333	66.6667			32.	28.	STH 2.3668	2	3	5	1	2	3	50
45	36	139	36	122	1	4.66667	2.7	±	0	3.35731	±	0.3	0	0	0	0	0	0			45.	0	0	0	0	0		45.	29.	STH 2.9156	0	0			45.	0	0			45.	29.	STH 2.9156	0	0	0	0	0	0	0
Total/average*	4894	4571.33	4495	4316.67	319	300.333	*8.2	±	1.62241	*6.5	±	0.62532	27	49	22	44	772	2207
		Genotype	Haploid plants
			50 mg	100 mg	suma		Genotype	HP
		1.	2	4	6		1.	6
		2.	3	2	5		2.	5
		3.	1	1	2		3.	2
		4.	0	2	2		4.	2
		5.	0	1	1		5.	1
		6.	1	1	2		6.	2
		7.	1	4	5		7.	5
		8.	0	3	3		8.	3
		10.	0	0	0		10.	0
		11.	0	3	3		11.	3
		12.	5	4	9		12.	9
		13.	0	1	1		13.	1
		14.	0	0	0		14.	0
		15.	0	0	0		15.	0
		19.	0	1	1		19.	1
		20.	0	0	0		20.	0
		21.	0	3	3		21.	3
		23.	3	2	5		23.	5
		24.	4	3	7		24.	7
		25.	0	4	4		25.	4
		26.	2	1	3		26.	3
		27.	3	2	5		27.	5
		28.	0	1	1		28.	1
		29.	1	3	4		29.	4
		30.	0	1	1		30.	1
		31.	0	0	0		31.	0
		32.	1	2	3		32.	3
		38.	0	0	0		38.	0
		45.	0	0	0		45.	0
		Total	27	49	76
[truncated: 18 more columns]

## Sheet: Plants in soil
Genotyp	Ziemia					Kolchicyna								Ziemia				Ziemia										Kolchicyna				Kolchicyna										Genotyp	Ziemia		Kolchicyna		Przeżywalność
	50 mg	100 mg	Suma	% 50 mg	% 100 mg	50 mg	100 mg	Suma	% 50 mg	% 100 mg			Genotyp	50 mg	100 mg		Genotyp	50 mg	100 mg								Genotyp	50 mg	100 mg		Genotyp	50 mg	100 mg										50 mg	100 mg	50 mg	100 mg	50 mg	100 mg
1.	4	4	8	50	50	1	4	5	20	80			1.	50	50		1.	50	50								1.	20	80		1.	20	80									1.	4	4	1	4	25	100
2.	4	2	6	66.6667	33.3333	1	2	#NAME?	#NAME?	#NAME?			2.	66.6667	33.3333		2.	66.6667	33.3333								2.	33.3333	66.6667		2.	33.3333	66.6667									2.	4	2	1	2	25	100
3.	2	2	4	50	50	1	1	2	50	50			3.	50	50		3.	50	50								3.	50	50		3.	50	50									3.	2	2	1	1	50	50
4.	0	3	3	0	100	0	1	1	0	100			4.	0	100		4.	0	100								4.	0	100		4.	0	100									4.	0	3	0	0	0	0
5.	0	2	2	0	100	0	1	1	0	100			5.	0	100		5.	0	100								5.	0	100		5.	0	100									5.	0	2	0	1	0	50
6.	2	2	4	50	50	1	1	2	50	50			6.	50	50		6.	50	50								6.	50	50		6.	50	50									6.	2	2	1	1	50	50
7.	1	3	4	25	75	1	3	4	25	75			7.	25	75		7.	25	75								7.	25	75		7.	25	75									7.	1	3	1	3	100	100
8.	0	6	6	0	100	0	3	3	0	100			8.	0	100		8.	0	100								8.	0	100		8.	0	100									8.	0	6	0	3	0	50
9.	0	0	0	0	0	0	0	0	0	0			9.	0	0		10.	100	0								9.	0	0		10.	0	0									9.	0	0	0	0	0	0
10.	1	0	1	100	0	0	0	0	0	0			10.	100	0		11.	0	100								10.	0	0		11.	0	100									10.	1	0	0	0	0	0
11.	0	3	3	0	100	0	2	2	0	100			11.	0	100		12.	63.6364	36.3636								11.	0	100		12.	55.5556	44.4444									11.	0	3	0	2	0	66.6667
12.	7	4	11	63.6364	36.3636	5	4	9	55.5556	44.4444			12.	63.6364	36.3636		13.	0	100								12.	55.5556	44.4444		13.	0	100									12.	7	4	5	4	71.4286	100
13.	0	2	2	0	100	0	1	1	0	100			13.	0	100		14.	0	0								13.	0	100		14.	0	0									13.	0	2	0	0	0	0
14.	0	0	0	0	0	0	0	0	0	0			14.	0	0		15.	100	0								14.	0	0		15.	0	0									14.	0	0	0	0	0	0
15.	1	0	1	100	0	0	0	0	0	0			15.	100	0		19.	0	100								15.	0	0		19.	0	100									15.	1	0	0	0	0	0
16.	0	1	1	0	100	0	1	1	0	100			16.	0	100		20.	0	0								16.	0	100		20.	0	0									16.	0	1	0	1	0	100
17.	0	2	2	0	100	0	2	2	0	100			17.	0	100		21.	25	75								17.	0	100		21.	0	100									17.	0	2	0	2	0	100
18.	0	0	0	0	0	0	0	0	0	0			18.	0	0		23.	25	75								18.	0	0		23.	33.3333	66.6667									18.	0	0	0	0	0	0
19.	0	1	1	0	100	0	1	1	0	100			19.	0	100		24.	50	50								19.	0	100		24.	66.6667	33.3333									19.	0	1	0	1	0	100
20.	0	0	0	0	0	0	0	0	0	0			20.	0	0		25.	0	100								20.	0	0		25.	0	100									20.	0	0	0	0	0	0
21.	1	3	4	25	75	0	3	3	0	100			21.	25	75		26.	66.6667	33.3333								21.	0	100		26.	50	50									21.	1	3	0	3	0	100
23.	1	3	4	25	75	1	2	3	33.3333	66.6667			23.	25	75		27.	50	50								23.	33.3333	66.6667		27.	60	40									23.	1	3	1	2	100	66.6667
24.	3	3	6	50	50	2	1	3	66.6667	33.3333			24.	50	50		28.	50	50								24.	66.6667	33.3333		28.	0	0									24.	3	3	2	1	66.6667	33.3333
25.	0	4	4	0	100	0	4	4	0	100			25.	0	100		29.	20	80								25.	0	100		29.	25	75									25.	0	4	0	4	0	100
26.	2	1	3	66.6667	33.3333	1	1	2	50	50			26.	66.6667	33.3333		30.	0	100								26.	50	50		30.	0	100									26.	2	1	1	1	50	100
27.	3	3	6	50	50	3	2	5	60	40			27.	50	50		31.	0	0								27.	60	40		31.	0	0									27.	3	3	3	2	100	66.6667
28.	1	1	2	50	50	0	0	0	0	0			28.	50	50		32.	40	60								28.	0	0		32.	33.3333	66.6667									28.	1	1	0	0	0	0
29.	1	4	5	20	80	1	3	4	25	75			29.	20	80		38.	0	0								29.	25	75		38.	0	0									29.	1	4	1	3	100	75
30.	0	1	1	0	100	0	1	1	0	100			30.	0	100		45.	0	0								30.	0	100		45.	0	0									30.	0	1	0	1	0	100
31.	0	0	0	0	0	0	0	0	0	0			31.	0	0												31.	0	0													31.	0	0	0	0	0	0
32.	2	3	5	40	60	1	2	3	33.3333	66.6667			32.	40	60												32.	33.3333	66.6667													32.	2	3	1	2	50	66.6667
36.	0	1	1	0	100	0	1	1	0	100			36.	0	100												36.	0	100													36.	0	1	0	1	0	100
38.	0	0	0	0	0	0	0	0	0	0			38.	0	0												38.	0	0													38.	0	0	0	0	0	0
45.	0	0	0	0	0	0	0	0	0	0			45.	0	0												45.	0	0													45.	0	0	0	0	0	0

## Sheet: Seeds
experimental no of embryo	genotype	experimental no of floret	2,5-D	no of seeds	Sum				Genotype	Σ of seeds	seeds from 50 mg 2,4-D	seeds from 100 mg 2,4-D	% of seeds from 50 mg	% of seeds from 100 mg
516	1	11	100	4					1.	120	0	120	0	100
897	1	19	100	89					2.	118	100	18	84.7458	15.2542
901	1	19	100	27	120				3.	76	36	40	47.3684	52.6316
310	2	10	50	32		100			4.	5	0	5	0	100
288	2	8	50	68					5.	6	0	6	0	100
792	2	19	100	18	118				6.	41	6	35	14.6341	85.3659
109	3	3	50	36					7.	24	0	24	0	100
484	3	15	100	40	76				8.	91	0	91	0	100
1110	4	21	100	5	5				9.	143	0	143	0	100
588	5	6	100	6	6				11.	68	0	68	0	100
2	6	1	50	6					12.	172	87	85	50.5814	49.4186
645	6	13	100	35	41				13.	91	0	91	0	100
668	7	11	100	23					16.	5	0	5	0	100
755	7	18	100	1	24				17.	39	0	39	0	100
520	8	2	100	91	91				21.	207	0	207	0	100
379	9	2	100	105					23.	114	114	0	100	0
944	9	15	100	38	143				24.	332	278	54	83.7349	16.2651
537	11	9	100	22					25.	774	0	774	0	100
657	11	14	100	18					26.	82	82	0	100	0
657	11	14	100	28	68				27.	360	69	291	19.1667	80.8333
169	12	3	100	1		84			29.	121	0	121	0	100
211	12	6	50	3					30.	169	0	169	0	100
222	12	11	100	43					32.	8	0	8	0	100
247	12	5	100	41					33.	9	0	9	0	100
258	12	7	50	36					35.	20	0	20	0	100
27	12	1	50	48	172				36.	11	0	11	0	100
675	13	16	100	91	91				39.	93	0	93	0	100
975	16	7	100	5	5				40.	1	0	1	0	100
848	17	9	100	39	39				41.	174	0	174	0	100
707	21	6	100	17					44.	260	0	260	0	100
770	21	8	100	190	207				46.	109	0	109	0	100
327	23	4	50	4
340	23	4	50	110	114
232	24	5	100	54
815	24	12	50	55
427	24	10	50	223	332
535	25	6	100	266
535	25	6	100	24
550	25	5	100	32
837	25	15	100	382
653	25	13	100	70	774
292	26	2	50	82	82
287	27	15	100	157
136	27	7	50	69
567	27	20	100	134	360
23	29	5	100	15
107	29	2	100	106	121
543	30	17	100	169	169
29	32	1	100	8	8
1052	33	10	100	9	9
1013	35	6	100	20	20
1120	36	14	100	11	11
1062	39	12	100	23
1068	39	13	100	26
924	39	3	100	44	93
1027	40	10	100	1	1
997	41	4	100	108
921	41	2	100	66	174
1023	44	5	100	189
1121	44	19	100	71	260
1060	46	10	100	109	109
SUM				3843
				30 plants without seeds
				61 DH lines - with seeds

## Sheet: Table 1
Genotype	no of florets		no of ovaries		no of embryos				Genotype	Pollinated florets		Isolated ovaries		Haploid embryos		Haploid embryos/florets [% ± SE]						Haploid plants		Haploid plants/florets [%]				Genotype	Plants after colchicine treatment
	50 mg	100 mg	50 mg	100 mg	50 mg	100 mg				50 mg	100 mg	50 mg	100 mg	50 mg	100 mg	50 mg			100 mg			50 mg	100 mg	50 mg	100 mg				50 mg	100 mg
1	139	418	131	404	31	46			1	139	418	131	404	31	46	25.8256	±	9.06186	13.7147	±	2.49405	1	4	0.719424	0.956938			1.	2	4
2	197	371	193	363	15	363			2	197	371	193	363	15	35	13.9	±	3.3	11.8	±	1.5	1	2	0.507614	0.539084			2.	3	2
3	302	399	268	410	20	30			3	302	399	268	410	20	30	8.59291	±	1.46156	11.5091	±	2.19052	1	1	0.331126	0.250627			3.	1	1
4	124	836	117	788	3	65			4	124	836	117	788	3	65	4.6875	±	0	8.02207	±	1.03526	0	0	0	0			4.	0	0
5	99	697	92	619	5	36			5	99	697	92	619	5	36	4.54757	±	1.42257	7.88291	±	0.933282	0	1	0	0.143472			5.	0	1
6	311	525	288	502	19	43			6	311	525	288	502	19	43	7	±	2	9.7	±	2.1	1	1	0.321543	0.190476			6.	1	1
7	164	627	160	610	7	34			7	164	627	160	610	7	34	4.4	±	1	7.6	±	1.1	1	3	0.609756	0.478469			7.	1	3
8	94	563	88	544	10	35			8	94	563	88	544	10	35	9.71008	±	7.27105	7.68465	±	1.42699	0	3	0	0.53286			8.	0	3
9	0	511	0	471	0	34			9	0	511	0	471	0	34	0	±	0	10.2	±	1.4	0	0	0	0			9.	0	0
10	229	571	224	543	5	12			10	229	571	224	543	5	12	5.7764	±	2.91925	4.36271	±	1.48333	0	0	0	0			10.	0	0
11	181	453	158	402	3	18			11	181	453	158	402	3	18	4.38165	±	1.67895	6.88957	±	1.15164	0	2	0	0.441501			11.	0	2
12	292	372	259	335	31	22			12	292	372	259	335	31	22	9.71702	±	4.83076	7.09637	±	1.45628	5	4	1.71233	1.07527			12.	5	4
13	170	432	157	404	8	27			13	170	432	157	404	8	27	6.8	±	1.8	8.1	±	1.5	0	0	0	0			13.	0	0
14	79	524	70	493	2	40			14	79	524	70	493	2	40	2.54183	±	0.160875	16.3944	±	10.6195	0	0	0	0			14.	0	0
15	79	534	43	504	5	36			15	79	534	43	504	5	36	6.32911	±	0	8.83168	±	1.26977	0	0	0	0			15.	0	0
16	0	315	0	281	0	14			16	0	315	0	281	0	14	0	±	0	11.3	±	3.4	0	1	0	0.31746			16.	0	1
17	0	517	0	503	0	42			17	0	517	0	503	0	42	0	±	0	10.3	±	1.3	0	2	0	0.386847			17.	0	2
18	0	264	0	228	0	9			18	0	264	0	228	0	9	0	±	0	10.5	±	1.9	0	0	0	0			18.	0	0
19	92	510	87	481	6	31			19	92	510	87	481	6	31	6.2	±	3.8	7	±	1	0	1	0	0.196078			19.	0	1
20	101	267	94	247	3	17			20	101	267	94	247	3	17	4.5	±	0.8	7.3	±	1.1	0	0	0	0			20.	0	0
21	60	449	58	421	8	29			21	60	449	58	421	8	29	13.3333	±	0	7.61786	±	0.963338	0	3	0	0.668151			21.	0	3
23	253	526	242	510	18	39			23	253	526	242	510	18	39	9.2	±	1.7	9.2	±	2.4	1	2	0.395257	0.380228			23.	1	2
24	240	459	218	420	12	29			24	240	459	218	420	12	29	6.2	±	1.4	8	±	1.6	2	1	0.833333	0.217865			24.	2	1
25	82	617	79	589	14	56			25	82	617	79	589	14	56	20.2226	±	8.141	9.59142	±	1.29815	0	4	0	0.648298			25.	0	4
26	182	643	180	621	21	39			26	182	643	180	621	21	39	11.5294	±	2.39237	7.64096	±	1.08942	1	1	0.549451	0.155521			26.	1	1
27	284	460	234	438	12	30			27	284	460	234	438	12	30	9.09121	±	1.65657	8.78269	±	1.39316	3	2	1.05634	0.434783			27.	3	2
28	293	464	269	448	20	42			28	293	464	269	448	20	42	8.3	±	3.1	10.3	±	2.1	0	0	0	0			28.	0	0
29	176	335	165	328	7	19			29	176	335	165	328	7	19	5.8	±	0.8	7	±	1.3	1	3	0.568182	0.895522			29.	1	3
30	243	241	215	226	7	17			30	243	241	215	226	7	17	4.76922	±	0.969457	10.7514	±	3.49812	0	1	0	0.414938			30.	0	1
31	164	401	161	371	8	11			31	164	401	161	371	8	11	5.15137	±	0.98345	5.10597	±	1.05154	0	0	0	0			31.	0	0
32	215	385	200	368	17	42			32	215	385	200	368	17	42	8.8	±	1.4	11.1	±	2.3	1	2	0.465116	0.519481			32.	1	2
33	0	420	0	392	0	21			36	6	339	6	311	0	35	0	±	0	17	±	3.9	0	1	0	0.294985			36.	0	1
34	0	282	0	256	0	14			38	13	218	9	195	1	7	7.69231	±	0	9.09006	±	2.1485	0	0	0	0			38.	0	0
35	0	413	0	370	0	35			45	36	417	36	366	1	14	2.7	±	0	6.3	±	0.9	0	0	0	0			45.	0	0
36	6	339	6	311	0	35
37	0	418	0	370	0	19
38	13	218	9	195	1	7
39	0	369	0	336	0	35
40	0	379	0	321	0	32
41	0	274	0	215	0	14
42	0	95	0	57	0	1
43	0	185	0	151	0	3
44	0	566	0	461	0	26
45	36	417	36	366	1	14
46	0	502	0	442	0	50

## Sheet: Table 2
	Genotype	Pollinated florets		Isolated ovaries		Haploid embryos		Haploid embryos/florets [% ± SE]						Haploid plants on MS medium		DH plants		Number of seeds		Plants after colchicine treatment			Genotype	Pollinated florets		Isolated ovaries		Haploid embryos		Haploid embryos/florets [% ± SE]								Genotype	Haploid plants		DH plants		Number of seeds		Seeds/DH lines				Genotype
		50 mg	100 mg	50 mg	100 mg	50 mg	100 mg	50 mg			100 mg			50 mg	100 mg	50 mg	100 mg	50 mg	100 mg	50 mg	100 mg			50 mg	100 mg	50 mg	100 mg	50 mg	100 mg	50 mg			100 mg						50 mg	100 mg	50 mg	100 mg	50 mg	100 mg	50 mg	100 mg
	1	139	139.333	131	134.667	31	15.3333	25.8256	±	3.06186	11.0048	±	0.83135	2	4	2	4	0	120	2	4		1	139	139.333	131	134.667	31	15.3333	25.8256	±	3.06186	11.0048	±	0.83135			1	2	4	2	4	0	120	0	30			1
	2	197	123.667	193	121	15	11.6667	13.9	±	3.3	9.43396	±	0.5	3	2	3	1	100	18	3	2		2	197	123.667	193	121	15	11.6667	13.9	±	3.3	9.43396	±	0.5			2	3	2	3	1	100	18	33.3333	18			2
	3	302	133	268	136.667	20	10	8.59291	±	1.46156	7.5188	±	0.730172	1	1	1	1	36	40	1	1		3	302	133	268	136.667	20	10	8.59291	±	1.46156	7.5188	±	0.730172			3	1	1	1	1	36	40	36	40			3
	4	124	278.667	117	262.667	3	21.6667	4.6875	±	0	7.77512	±	0.345087	0	2	0	2	0	5	0	1		4	124	278.667	117	262.667	3	21.6667	4.6875	±	0	7.77512	±	0.345087			4	0	2	0	2	0	5	0	2.5			4
	5	99	232.333	92	206.333	5	12	4.54757	±	1.42257	5.16499	±	0.311094	0	1	0	1	0	6	0	1		5	99	232.333	92	206.333	5	12	4.54757	±	1.42257	5.16499	±	0.311094			5	0	1	0	1	0	6	0	6			5
	6	311	175	288	167.333	19	14.3333	7	±	2	8.19048	±	0.7	1	1	1	1	6	35	1	1		6	311	175	288	167.333	19	14.3333	7	±	2	8.19048	±	0.7			6	1	1	1	1	6	35	6	35			6
	7	164	209	160	203.333	7	11.3333	4.4	±	1	5.42265	±	0.366667	1	4	1	4	0	24	1	3		7	164	209	160	203.333	7	11.3333	4.4	±	1	5.42265	±	0.366667			7	1	4	1	4	0	24	0	6			7
	8	94	187.667	88	181.333	10	11.6667	9.71008	±	7.27105	6.2167	±	0.475663	0	3	0	2	0	91	0	3		8	94	187.667	88	181.333	10	11.6667	9.71008	±	7.27105	6.2167	±	0.475663			8	0	3	0	2	0	91	0	45.5			8
	10	229	190.333	224	181	5	4	5.7764	±	2.91925	2.10158	±	0.494442	0	0	0	0	0	0	0	0		10	229	190.333	224	181	5	4	5.7764	±	2.91925	2.10158	±	0.494442			10	0	0	0	0	0	0	0	0			9
	11	181	151	158	134	3	6	4.38165	±	1.67895	3.97351	±	0.38388	0	3	0	3	0	68	0	2		11	181	151	158	134	3	6	4.38165	±	1.67895	3.97351	±	0.38388			11	0	3	0	3	0	68	0	22.6667			10
	12	292	124	259	111.667	31	7.33333	9.71702	±	1.83076	5.91398	±	0.485427	5	4	3	4	87	85	5	4		12	292	124	259	111.667	31	7.33333	9.71702	±	1.83076	5.91398	±	0.485427			12	5	4	3	4	87	85	29	21.25			11
	13	170	144	157	134.667	8	9	6.8	±	1.8	6.25	±	0.5	0	1	0	1	0	91	0	1		13	170	144	157	134.667	8	9	6.8	±	1.8	6.25	±	0.5			13	0	1	0	1	0	91	0	91			12
	14	79	174.667	70	164.333	2	13.3333	2.54183	±	0.160875	7.63359	±	3.53984	0	0	0	0	0	0	0	0		14	79	174.667	70	164.333	2	13.3333	2.54183	±	0.160875	7.63359	±	3.53984			14	0	0	0	0	0	0	0	0			13
	15	79	178	43	168	5	12	6.32911	±	0	6.74157	±	0.423258	0	0	0	0	0	0	0	0		15	79	178	43	168	5	12	6.32911	±	0	6.74157	±	0.423258			15	0	0	0	0	0	0	0	0			14
	19	92	170	87	160.333	6	10.3333	6.2	±	2.8	6.07843	±	0.333333	0	1	0	1	0	0	0	1		19	92	170	87	160.333	6	10.3333	6.2	±	2.8	6.07843	±	0.333333			19	0	1	0	1	0	0	0	0			15
	20	101	89	94	82.3333	3	5.66667	4.5	±	0.8	6.36704	±	0.366667	0	0	0	0	0	0	0	0		20	101	89	94	82.3333	3	5.66667	4.5	±	0.8	6.36704	±	0.366667			20	0	0	0	0	0	0	0	0			16
	21	60	149.667	58	140.333	8	9.66667	13.3333	±	0	6.4588	±	0.321113	0	3	0	1	0	207	0	3		21	60	149.667	58	140.333	8	9.66667	13.3333	±	0	6.4588	±	0.321113			21	0	3	0	1	0	207	0	207			17
	38	13	72.6667	9	65	1	2.33333	7.69231	±	0	3.21101	±	0.716166	0	0	0	0	0	0	0	0		38	13	72.6667	9	65	1	2.33333	7.69231	±	0	3.21101	±	0.716166			38	0	0	0	0	0	0	0	0			18
	23	253	175.333	242	170	18	13	9.2	±	1.7	7.41445	±	0.8	3	2	3	1	114	0	1	2		23	253	175.333	242	170	18	13	9.2	±	1.7	7.41445	±	0.8			23	3	2	3	1	114	0	38	0			19
	24	240	153	218	140	12	9.66667	6.2	±	1.4	6.31808	±	0.533333	4	3	3	3	278	54	2	1		24	240	153	218	140	12	9.66667	6.2	±	1.4	6.31808	±	0.533333			24	4	3	3	3	278	54	92.6667	18			20
	25	82	205.667	79	196.333	14	18.6667	20.2226	±	2.141	9.07618	±	0.432718	0	4	0	4	0	774	0	4		25	82	205.667	79	196.333	14	18.6667	20.2226	±	2.141	9.07618	±	0.432718			25	0	4	0	4	0	774	0	193.5			21
	26	182	214.333	180	207	21	13	11.5294	±	2.39237	6.06532	±	0.36314	2	1	2	1	82	0	1	1		26	182	214.333	180	207	21	13	11.5294	±	2.39237	6.06532	±	0.36314			26	2	1	2	1	82	0	41	0			22
	27	284	153.333	234	146	12	10	9.09121	±	1.65657	6.52174	±	0.464385	3	2	2	2	69	291	3	2		27	284	153.333	234	146	12	10	9.09121	±	1.65657	6.52174	±	0.464385			27	3	2	2	2	69	291	34.5	145.5			23
	28	293	154.667	269	149.333	20	14	8.3	±	2.1	9.05172	±	0.7	0	1	0	1	0	0	0	0		28	293	154.667	269	149.333	20	14	8.3	±	2.1	9.05172	±	0.7			28	0	1	0	1	0	0	0	0			24
	29	176	111.667	165	109.333	7	6.33333	5.8	±	0.8	5.67164	±	0.433333	1	3	0	3	0	121	1	3		29	176	111.667	165	109.333	7	6.33333	5.8	±	0.8	5.67164	±	0.433333			29	1	3	0	3	0	121	0	40.3333			25
	30	243	80.3333	215	75.3333	7	5.66667	4.76922	±	0.969457	7.05394	±	1.16604	0	1	0	1	0	169	0	1		30	243	80.3333	215	75.3333	7	5.66667	4.76922	±	0.969457	7.05394	±	1.16604			30	0	1	0	1	0	169	0	169			26
	31	164	133.667	161	123.667	8	3.66667	5.15137	±	0.98345	2.74314	±	0.350513	0	0	0	0	0	0	0	0		31	164	133.667	161	123.667	8	3.66667	5.15137	±	0.98345	2.74314	±	0.350513			31	0	0	0	0	0	0	0	0			27
	32	215	128.333	200	122.667	17	14	8.8	±	1.4	10.9091	±	0.766667	1	2	1	2	0	8	1	2		32	215	128.333	200	122.667	17	14	8.8	±	1.4	10.9091	±	0.766667			32	1	2	1	2	0	8	0	4			28
	45	36	139	36	122	1	4.66667	2.7	±	0	3.35731	±	0.3	0	0	0	0	0	0	0	0		45	36	139	36	122	1	4.66667	2.7	±	0	3.35731	±	0.3			45	0	0	0	0	0	0	0	0			29
	Total/average*	4894	4571.33	4495	4316.67	319	300.333	*8.2	±	1.62241	*6.5	±	0.62532	27	49	22	44	772	2207	22	43		Total/average*	4894	4571.33	4495	4316.67	319	300.333	*8.2	±	1.62241	*6.5	±	0.62532			Total	27	49	22	44	772	2207					Total
[truncated: 28 more columns]
